# Supplementary material
Source: PubMed Central journal article supplement (PMC11518581)
Supplement: NIHMS2026570-supplement-1.pdf [file NIHMS2026570-supplement-1.pdf]

Supplementary Table 1

*Bivariate Correlation of Key Violence Variables*

|    | 1     | 2     | 3     | 4     | 5     | 6     | 7     | 8     | 9     | 10    | 11   |
|----|-------|-------|-------|-------|-------|-------|-------|-------|-------|-------|------|
| 1  | 1.00  |       |       |       |       |       |       |       |       |       |      |
| 2  | 0.23* | 1.00  |       |       |       |       |       |       |       |       |      |
| 3  | 0.20* | 0.29* | 1.00  |       |       |       |       |       |       |       |      |
| 4  | 0.29* | 0.45* | 0.16* | 1.00  |       |       |       |       |       |       |      |
| 5  | 0.27* | 0.16* | 0.48* | 0.36* | 1.00  |       |       |       |       |       |      |
| 6  | 0.08* | 0.06* | 0.10* | 0.10* | 0.09* | 1.00  |       |       |       |       |      |
| 7  | 0.33* | 0.32* | 0.21* | 0.46* | 0.28* | 0.08* | 1.00  |       |       |       |      |
| 8  | 0.13* | 0.01  | 0.04* | 0.03* | 0.05* | 0.03* | 0.05* | 1.00  |       |       |      |
| 9  | 0.19* | 0.19* | 0.11* | 0.18* | 0.11* | 0.07* | 0.25* | 0.10* | 1.00  |       |      |
| 10 | 0.00* | 0.04* | 0.10* | 0.09* | 0.12* | 0.09* | 0.11* | -0.01 | 0.05* | 1.00  |      |
| 11 | 0.06* | 0.09* | 0.10* | 0.08* | 0.09* | 0.10* | 0.08* | -0.00 | 0.06* | 0.14* | 1.00 |

*Note.* Statistical significance was noted as  $*p < 0.05$ .

1. Neglect
2. Father's verbal abuse
3. Mother's verbal abuse
4. Father's physical abuse
5. Mother's physical abuse
6. Sexual abuse
7. Witnessing domestic violence
8. Parental divorce
9. Parental substance use
10. IPV victimization
11. Elder abuse victimization

Supplementary Table 2

*Types of ACE predicting Elder Abuse Victimization via IPV*

|                                                                                   | IPV victimization  | Elder Abuse<br>Victimization |
|-----------------------------------------------------------------------------------|--------------------|------------------------------|
|                                                                                   | <i>b</i> (s.e.)    |                              |
| <b>Direct effects</b>                                                             |                    |                              |
| Neglect                                                                           | -0.01 (0.00)       | 0.02 (0.07)                  |
| Father's verbal abuse                                                             | -0.01 (0.01)       | 0.17 (0.06)**                |
| Mother's verbal abuse                                                             | 0.02 (0.01)        | 0.10 (0.06)                  |
| Father's physical abuse                                                           | 0.02 (0.01)*       | -0.01 (0.08)                 |
| Mother's physical abuse                                                           | 0.06 (0.01)***     | 0.17 (0.08)                  |
| Sexual abuse                                                                      | 0.05 (0.01)***     | 0.33 (0.08)***               |
| Witnessing domestic violence                                                      | 0.07 (0.01)***     | 0.12 (0.08)                  |
| Parental divorce                                                                  | -0.02 (0.01)       | -0.04 (0.07)                 |
| Parental substance use                                                            | 0.01 (0.01)        | 0.06 (0.05)                  |
| IPV victimization                                                                 |                    | 0.49 (0.07)***               |
| Male                                                                              | -0.05 (0.01)***    | -0.20 (0.04)***              |
| Age                                                                               | -0.01 (0.01)       | -0.07 (0.04)                 |
| Currently married                                                                 | -0.09 (0.01)***    | 0.17 (0.05)***               |
| Years of education                                                                | 0.00 (0.00)        | 0.04 (0.01)***               |
| Father's years of education                                                       | 0.00 (0.00)        | 0.01 (0.01)                  |
| Depressive symptoms                                                               | 0.02 (0.01)***     | 0.22 (0.03)***               |
| Self-rated health                                                                 | -0.00 (0.00)       | -0.05 (0.02)*                |
| Social support                                                                    | -0.01 (0.01)       | -0.23 (0.07)**               |
| <b>Indirect effect</b>                                                            |                    |                              |
|                                                                                   | <i>b</i> (s.e.)    | <i>p</i> value               |
| Neglect → IPV victimization → Elder<br>victimization                              | -0.01 (0.01)       | <i>p</i> < .001              |
| Father's verbal abuse → IPV victimization →<br>Elder victimization                | -0.00 (0.00)       | <i>p</i> = 0.41              |
| Mother's verbal abuse → IPV victimization<br>→ Elder victimization                | 0.01 (0.01)        | <i>p</i> = 0.08              |
| <b>Father's physical abuse → IPV<br/>victimization → Elder victimization</b>      | <b>0.01 (0.01)</b> | <b><i>p</i> &lt; .05</b>     |
| <b>Mother's physical abuse → IPV<br/>victimization → Elder victimization</b>      | <b>0.03 (0.01)</b> | <b><i>p</i> &lt; .001</b>    |
| <b>Sexual abuse → IPV victimization → Elder<br/>victimization</b>                 | <b>0.03 (0.01)</b> | <b><i>p</i> &lt; .001</b>    |
| <b>Witnessing domestic violence → IPV<br/>victimization → Elder victimization</b> | <b>0.03 (0.01)</b> | <b><i>p</i> &lt; .001</b>    |
| Parental divorce → IPV victimization →<br>Elder victimization                     | -0.01 (0.01)       | <i>p</i> = 0.25              |
| Parental substance use → IPV victimization<br>→ Elder victimization               | 0.00 (0.00)        | <i>p</i> = 0.37              |

Note. Standard errors in parentheses. \**p* < .05, \*\**p* < .01, \*\*\**p* < .001.
